# Supplementary material for: Knockdown of Inner Arm Protein IC138 in Trypanosoma brucei Causes Defective Motility and Flagellar Detachment
Source: PubMed Central journal article supplement (PMC4640498; doi:10.1371/journal.pone.0139579), 2015-11-10

# S1 Figure

## A

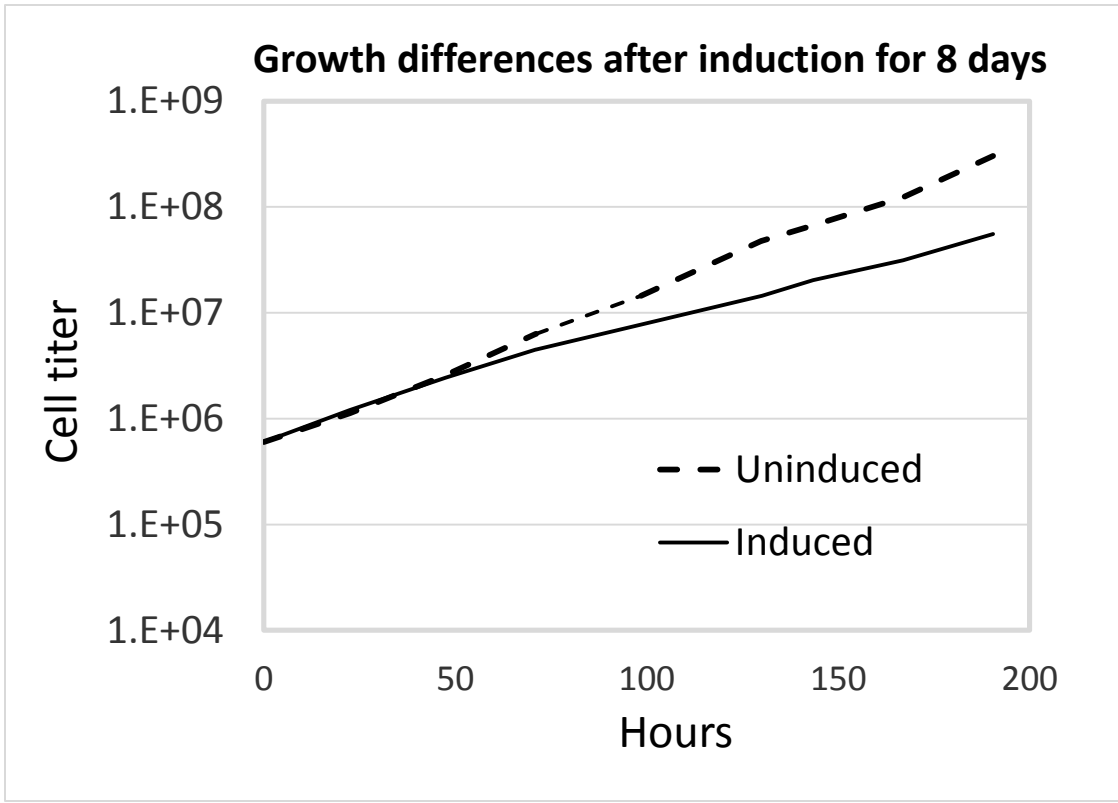

## B

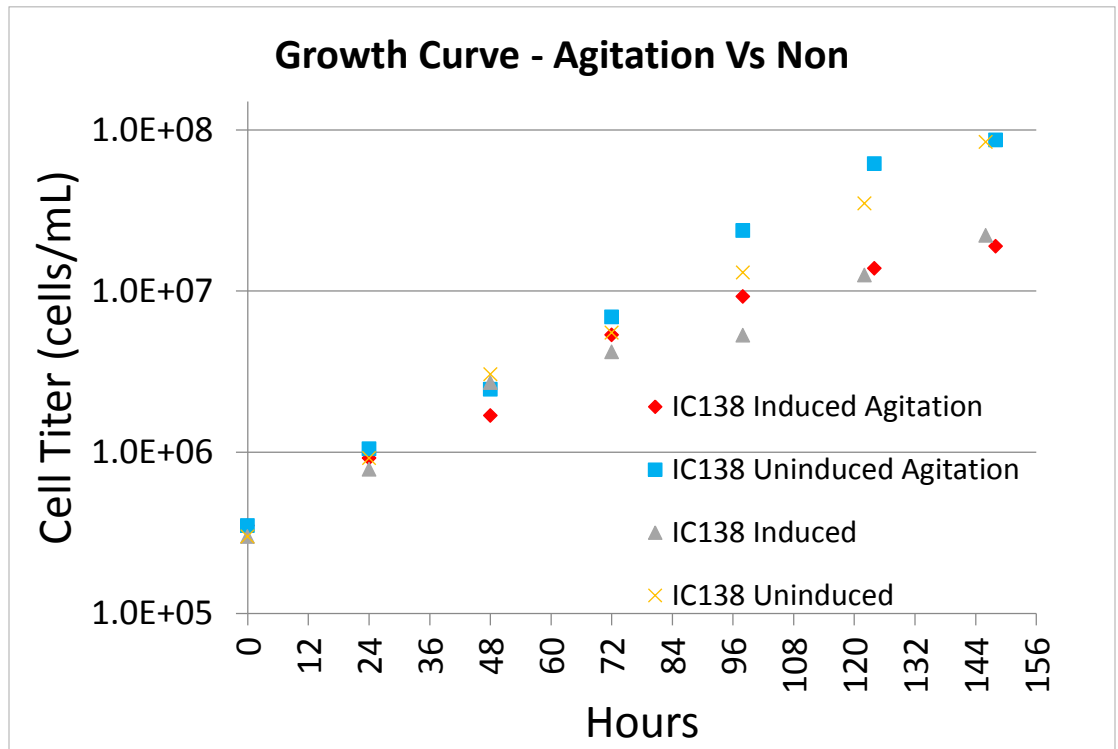

Supplement: pone.0139579.s001.pdf [file pone.0139579.s001.pdf]
