# Supplementary material for: Knockdown of Inner Arm Protein IC138 in Trypanosoma brucei Causes Defective Motility and Flagellar Detachment
Source: PubMed Central journal article supplement (PMC4640498; doi:10.1371/journal.pone.0139579), 2015-11-10

### S3 Figure

#### A Cell motility of Uninduced cells

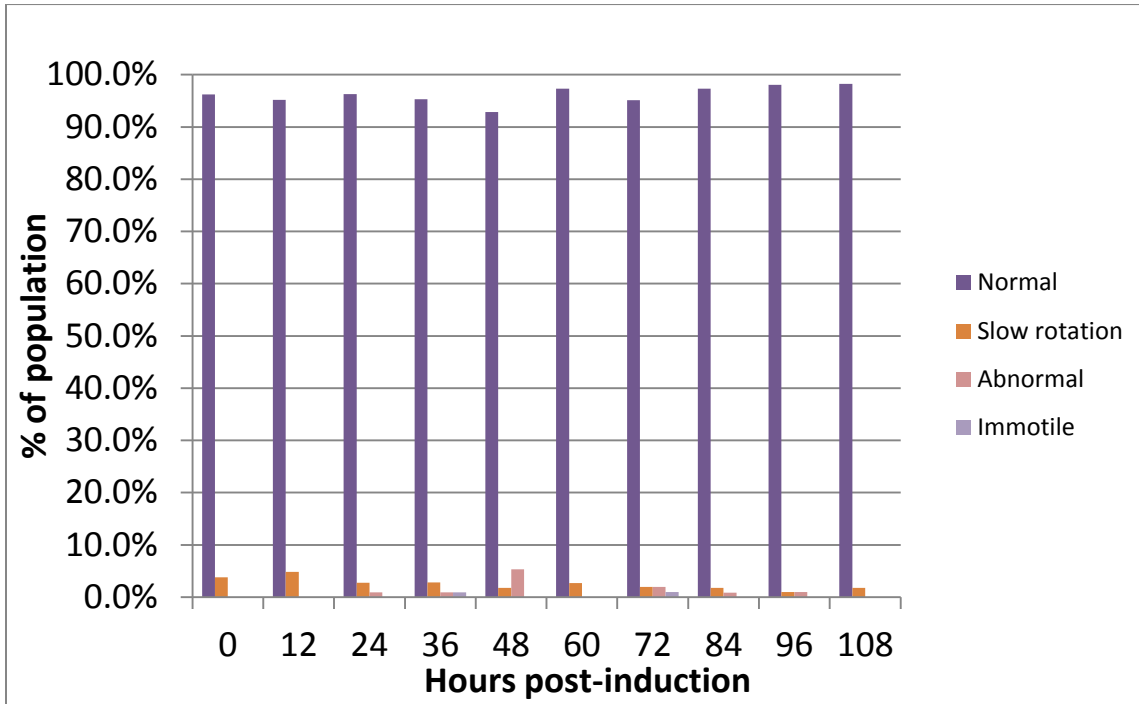

#### B Flagellar Attachment of Uninduced Cells

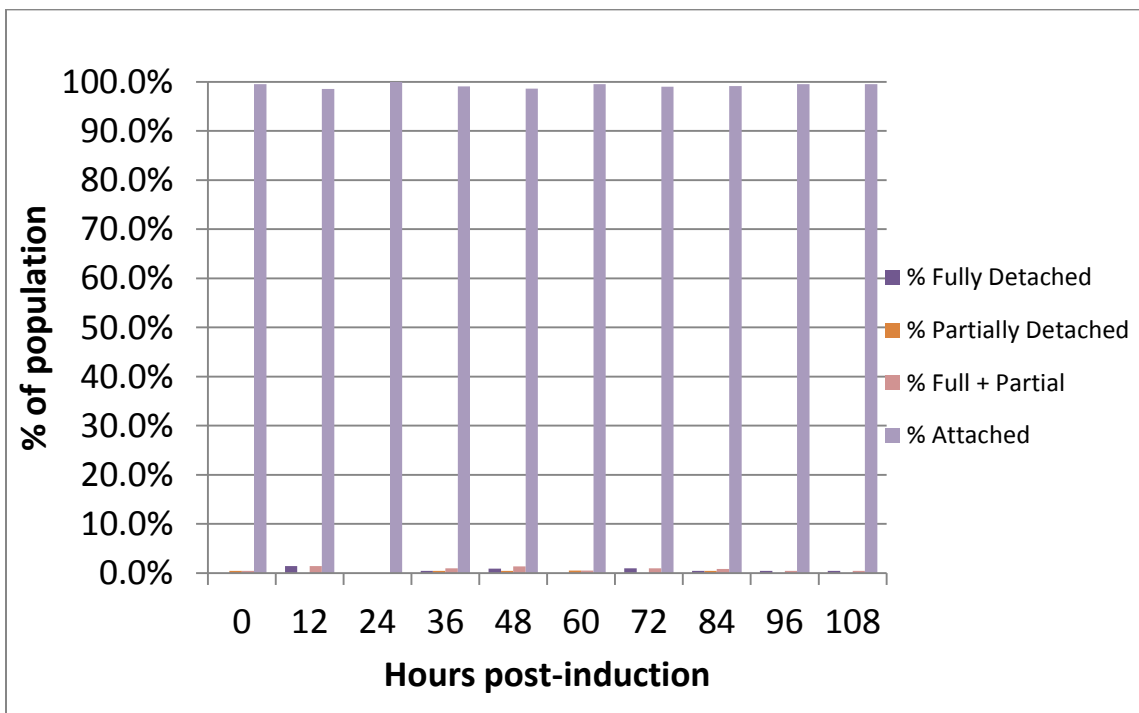

Supplement: pone.0139579.s003.pdf [file pone.0139579.s003.pdf]
