# Supplementary material for: Knockdown of Inner Arm Protein IC138 in Trypanosoma brucei Causes Defective Motility and Flagellar Detachment
Source: PubMed Central journal article supplement (PMC4640498; doi:10.1371/journal.pone.0139579), 2015-11-10

## S4 Figure

### A. Motility of RNAi-induced cells with partially or fully detached flagella

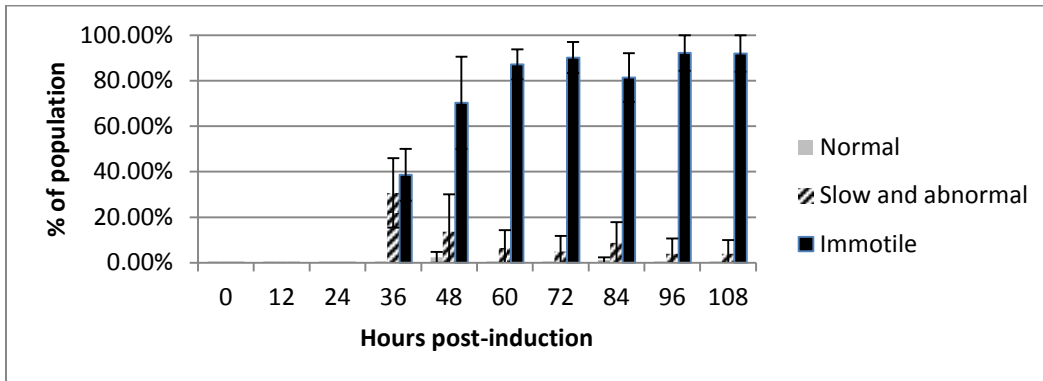

### B. Motility: cells with attached flagella only

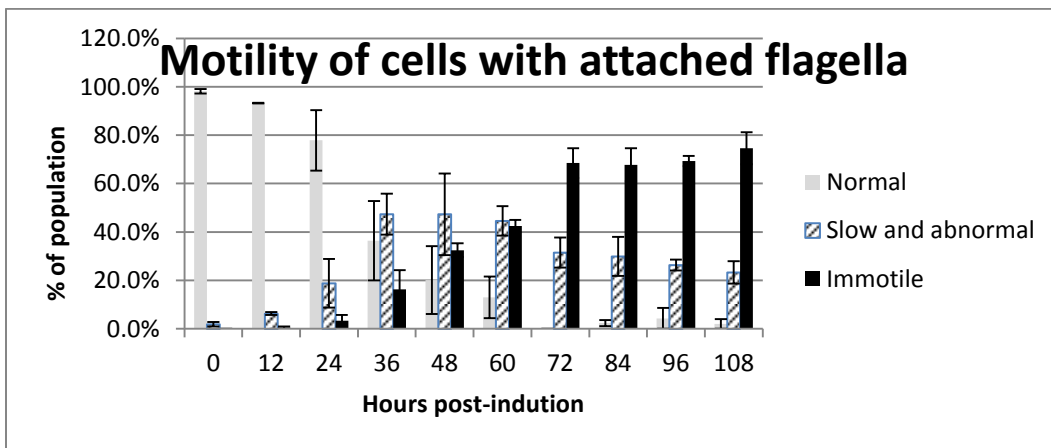

Supplement: pone.0139579.s004.pdf [file pone.0139579.s004.pdf]
