# Supplementary material for: Knockdown of Inner Arm Protein IC138 in Trypanosoma brucei Causes Defective Motility and Flagellar Detachment
Source: PubMed Central journal article supplement (PMC4640498; doi:10.1371/journal.pone.0139579), 2015-11-10

**A**

MW Lanes:

(kD)

250

150

100

75

50

37

25

20

15

10

1 2 3 4 5 6 7 8 9

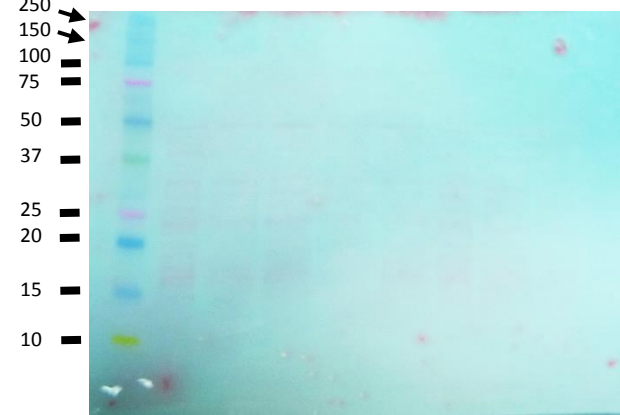

1 2 3 4 5 6 7 8 9

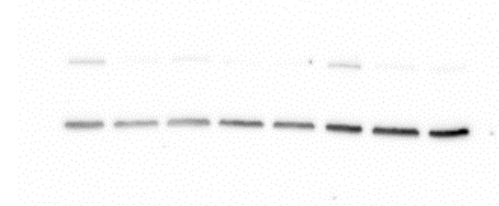**B**

MW Lanes:

(kD)

150

100

75

50

37

25

1 2 3 4 5 6 7 8

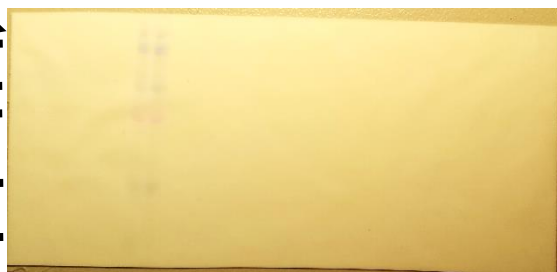

1 2 3 4 5 6 7 8

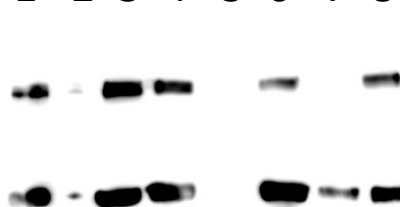

1 2 3 4 5 6 7 8

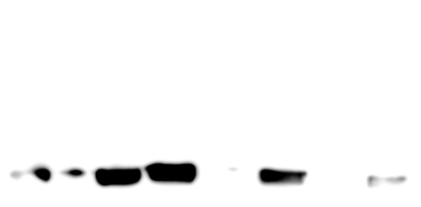**C**

MW Lanes:

(kD)

1

2

3

4

5

6

7

8

9

10

kD

250

150

100

75

50

37

25

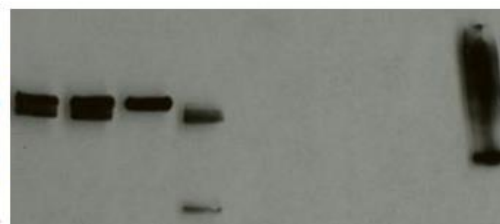

Supplement: pone.0139579.s005.pdf [file pone.0139579.s005.pdf]
