# Supplementary material for: Knockdown of Inner Arm Protein IC138 in Trypanosoma brucei Causes Defective Motility and Flagellar Detachment
Source: PubMed Central journal article supplement (PMC4640498; doi:10.1371/journal.pone.0139579), 2015-11-10
Supplement: pone.0139579.s006.pdf [file pone.0139579.s006.pdf]

| Date:                                   | Time:                   | Cells:                             | Hours Induced                               |                         |
|-----------------------------------------|-------------------------|------------------------------------|---------------------------------------------|-------------------------|
|                                         | Fully Attached Flagella | Partially Detached Flagella (Loop) | Partially Detached Flagella (Loop and tail) | Fully Detached Flagella |
| <b>Normal Body Movement</b>             | Normal                  | Normal                             | Normal                                      | Normal                  |
|                                         | Abnormal                | Abnormal                           | Abnormal                                    | Abnormal                |
|                                         | Paralyzed               | Partially Paralyzed                | Partially Paralyzed                         | Paralyzed               |
|                                         |                         | Paralyzed                          | Paralyzed                                   |                         |
| <b>Slow Helical Body Movement</b>       | Normal                  | Normal                             | Normal                                      | Normal                  |
|                                         | Abnormal                | Abnormal                           | Abnormal                                    | Abnormal                |
|                                         | Paralyzed               | Partially Paralyzed                | Partially Paralyzed                         | Paralyzed               |
|                                         |                         | Paralyzed                          | Paralyzed                                   |                         |
| <b>Abnormal Body Movement "Twitchy"</b> | Normal                  | Normal                             | Normal                                      | Normal                  |
|                                         | Abnormal                | Abnormal                           | Abnormal                                    | Abnormal                |
|                                         | Paralyzed               | Partially Paralyzed                | Partially Paralyzed                         | Paralyzed               |
|                                         |                         | Paralyzed                          | Paralyzed                                   |                         |
| <b>Immotile Body (Tail Twitch)</b>      | Normal                  | Normal                             | Normal                                      | Normal                  |
|                                         | Abnormal                | Abnormal                           | Abnormal                                    | Abnormal                |
|                                         | Paralyzed               | Partially Paralyzed                | Partially Paralyzed                         | Paralyzed               |
|                                         |                         | Paralyzed                          | Paralyzed                                   |                         |

Cannot score:

Clumps:
