# Supplementary material for: Knockdown of Inner Arm Protein IC138 in Trypanosoma brucei Causes Defective Motility and Flagellar Detachment
Source: PubMed Central journal article supplement (PMC4640498; doi:10.1371/journal.pone.0139579), 2015-11-10
Supplement: pone.0139579.s009.pdf [file pone.0139579.s009.pdf]

### S4 Table: Nucleus: Cell ratios

|          | Uninduced |        |             | induced |        |             |
|----------|-----------|--------|-------------|---------|--------|-------------|
|          | Cells     | Nuclei | ratio       | Cells   | Nuclei | ratio       |
|          | 25        | 27     | 1.08        | 55      | 70     | 1.27        |
|          | 34        | 38     | 1.12        | 61      | 70     | 1.15        |
|          | 43        | 48     | 1.12        | 55      | 64     | 1.16        |
|          | 30        | 33     | 1.10        | 72      | 88     | 1.22        |
|          | 39        | 44     | 1.13        | 53      | 60     | 1.13        |
|          | 55        | 66     | 1.20        | 24      | 32     | 1.33        |
|          | 43        | 45     | 1.05        | 36      | 47     | 1.31        |
|          | 55        | 69     | 1.25        | 22      | 23     | 1.05        |
|          |           |        |             | 17      | 20     | 1.18        |
| Total    | 324       | 370    |             | 395     | 474    |             |
| Mean     |           |        | 1.13        |         |        | 1.20        |
| St. Dev. |           |        | <b>0.06</b> |         |        | <b>0.09</b> |
